# Supplementary material
Source: ML conference proceedings conference paper supplement (https://openaccess.thecvf.com/content/CVPR2023/html/Shang_Post-Training_Quantization_on_CVPR_2023_paper.html)
Supplement: Supplementary file 1 [file Shang_Post-Training_Quantization_on_CVPR_2023_supplemental.pdf]

## 1. Appendix

### 1.1. Nonuniform Distribution Selection

Notably, we have carefully chosen the nonuniform distribution for sampling timestep  $t$  (Eq. 15 in the main paper). Specifically, except for the normal distribution in the paper, we also consider the Poisson and exponential distributions. Also, a series of hyperparameter selection experiments are conducted. More details are presented in Tab. 1.

Table 1. Hyperparameter selection for non-uniform distribution in Algorithm 1 in the main paper.

| Task                                                                  | Method                                              | IS $\uparrow$ | FID $\downarrow$ | sFID $\downarrow$ |
|-----------------------------------------------------------------------|-----------------------------------------------------|---------------|------------------|-------------------|
| Other Nonuniform Distributions                                        | FP                                                  | 14.88         | 21.63            | 17.66             |
|                                                                       | Poisson                                             | 13.29         | 34.54            | 25.84             |
|                                                                       | Exponential                                         | 12.87         | 39.91            | 30.04             |
| Normal Distribution with Different Mean $\mu$ , and Variance $\sigma$ | $\mu = \frac{T}{2}, \sigma = 0.5\sqrt{\frac{T}{2}}$ | 15.45         | 25.11            | 17.35             |
|                                                                       | $\mu = \frac{T}{2}, \sigma = 1.0\sqrt{\frac{T}{2}}$ | 15.65         | 24.83            | 18.90             |
|                                                                       | $\mu = \frac{T}{2}, \sigma = 2.0\sqrt{\frac{T}{2}}$ | 15.85         | 24.27            | 17.92             |
|                                                                       | $\mu = \frac{1.5T}{2}, \sigma = \sqrt{\frac{T}{2}}$ | 12.63         | 39.09            | 35.81             |
|                                                                       | $\mu = \frac{1.0T}{2}, \sigma = \sqrt{\frac{T}{2}}$ | 15.65         | 24.83            | 18.90             |
|                                                                       | $\mu = \frac{0.5T}{2}, \sigma = \sqrt{\frac{T}{2}}$ | 15.88         | 23.96            | 17.67             |

### 1.2. Actual Acceleration

We test the latency(ms) of the original network (provided checkpoint) and the quantized network on Nvidia RTX A6000 GPU. The results in Table 2 show that the 8-bit quantization achieves about 2x speedup. The speedup can be more significant on NPU.

Table 2. Inference speed test with Nvidia RTX A6000.

| Task     | Batch Size | FP32  | INT8  |
|----------|------------|-------|-------|
| ImageNet | 1          | 9.80  | 4.99  |
|          | 64x64      | 64.42 | 28.16 |
| CIFAR    | 1          | 5.92  | 2.98  |
|          | 32x32      | 23.15 | 14.13 |
